# Supplementary material for: Rational Design of Ti3C2Tx MXene Inks for Conductive, Transparent Films
Source: PubMed Central journal article supplement (PMC9979651; doi:10.1021/acsnano.2c11180), 2023-02-07
Supplement: nn2c11180_si_001.pdf [file nn2c11180_si_001.pdf]

## Supporting information

### Rational Design of $Ti_3C_2T_x$ MXene Inks for Conductive, Transparent Films

Tiezhu Guo<sup>1,2</sup>, Di Zhou<sup>1\*</sup>, Shungui Deng<sup>2,3</sup>, Mohammad Jafarpour<sup>2,3</sup>, Jonathan Avaro<sup>4,5</sup>, Antonia Neels<sup>6,7</sup>, Jakob Heier<sup>2\*</sup>, Chuanfang (John) Zhang<sup>8\*</sup>

1 Key Laboratory of Multifunctional Materials and Structures, Ministry of Education, School of Electronic Science and Engineering, Xi'an Jiaotong University, Xi'an 710049, Shaanxi, China

2 Laboratory for Functional Polymers, Empa, Swiss Federal Laboratories for Materials Science and Technology, Überlandstrasse 129, CH-8600, Dübendorf, Switzerland

3 Institute of Materials Science and Engineering, Ecole Polytechnique Federale de Lausanne (EPFL), Station 12, CH-1015 Lausanne, Switzerland

4 Center for X-ray Analytics, Empa, Swiss Federal Laboratories for Materials Science and Technology, Lerchenfeldstrasse 5, CH-9014, St. Gallen, Switzerland.

5 Biomimetic Membranes and Textile, Empa, Swiss Federal Laboratories for Materials Science and Technology, Lerchenfeldstrasse 5, St. Gallen CH-9014, Switzerland.

6 Center for X-ray Analytics, Empa, Swiss Federal Laboratories for Materials Science and Technology, Überlandstrasse 129, CH-8600, Dübendorf, Switzerland.

7 Department of Chemistry, University of Fribourg, Chemin du Musée 9, CH-1700, Fribourg, Switzerland

8 College of Materials Science & Engineering, Sichuan University, Chengdu, 610065, Sichuan, China

<sup>1</sup>Corresponding author ([zhoudi1220@mail.xjtu.edu.cn](mailto:zhoudi1220@mail.xjtu.edu.cn))

<sup>2</sup>Corresponding author ([Jakob.Heier@empa.ch](mailto:Jakob.Heier@empa.ch))

<sup>3</sup>Corresponding author ([chuanfang.zhang@scu.edu.cn](mailto:chuanfang.zhang@scu.edu.cn))

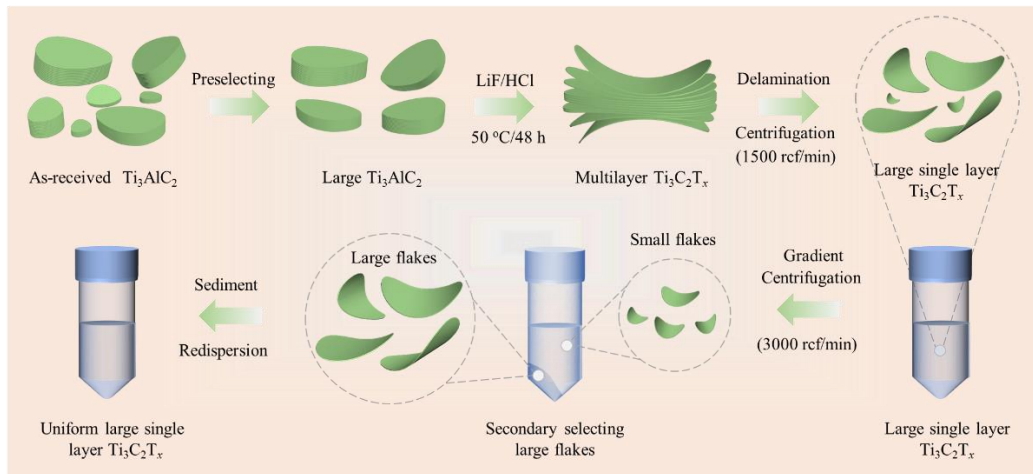

**Scheme S1** Schematic illustration of the synthesis process of ultralarge sized  $\text{Ti}_3\text{C}_2\text{T}_x$  flakes from the as-received  $\text{Ti}_3\text{AlC}_2$  phase.

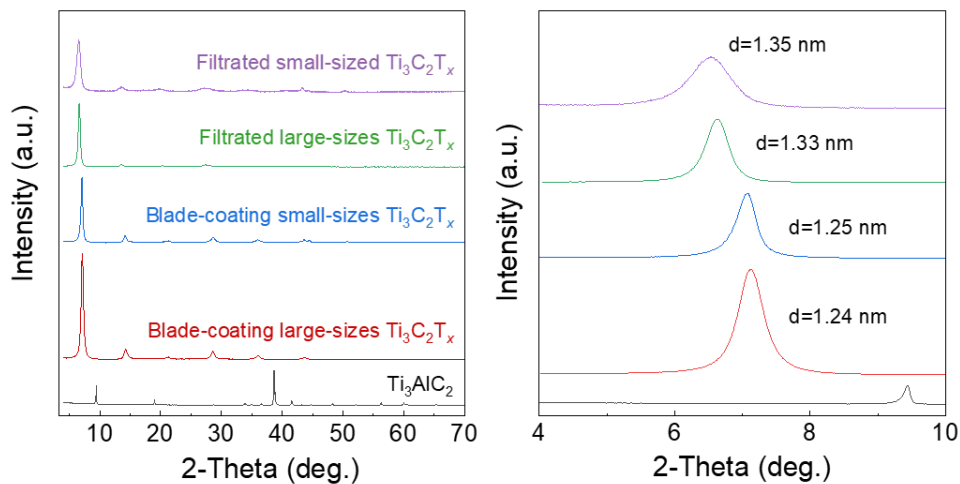

**Figure S1** XRD patterns of  $\text{Ti}_3\text{AlC}_2$ , opaque  $\text{Ti}_3\text{C}_2\text{T}_x$  films with large-sizes and small-sizes by vacuum-assisted filtration and blade coating.

$\text{Ti}_3\text{C}_2\text{T}_x$  films prepared by blade coating have a smaller interlayer spacing than those of filtrated films. Their interlayer spacing is 1.24 nm (blade-coating large-sized  $\text{Ti}_3\text{C}_2\text{T}_x$ ), 1.25 nm (blade-coating small-sized  $\text{Ti}_3\text{C}_2\text{T}_x$ ), 1.33 nm (filtrated large-sized  $\text{Ti}_3\text{C}_2\text{T}_x$ ), 1.35 nm (filtrated large-sizes  $\text{Ti}_3\text{C}_2\text{T}_x$ ), respectively.

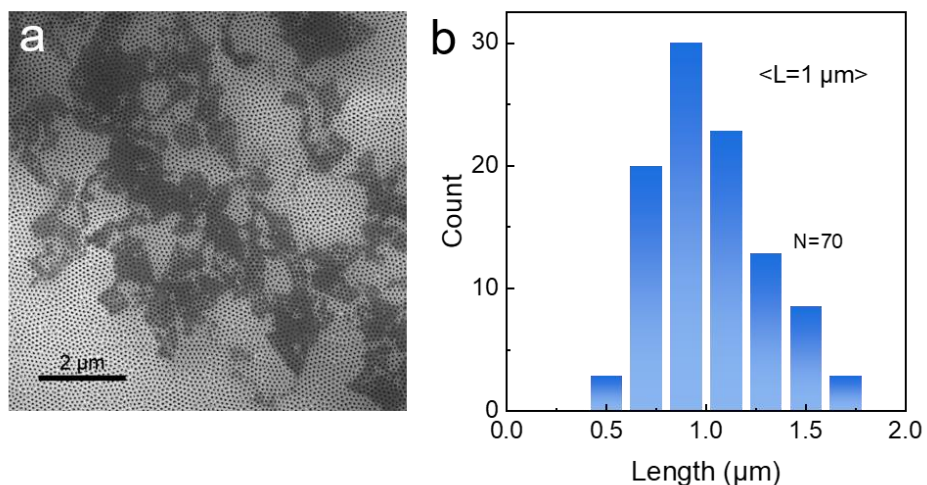

**Figure S2** **a** SEM image of small-sized  $\text{Ti}_3\text{C}_2\text{T}_x$  flakes on anodic aluminum oxide (AAO). **b** Histogram of the small-sized  $\text{Ti}_3\text{C}_2\text{T}_x$  flakes determined by statistical analysis.

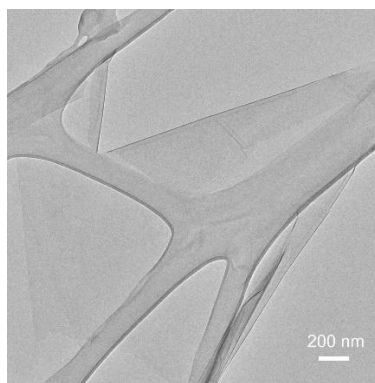

**Figure S3** TEM image of **a**  $\text{Ti}_3\text{C}_2\text{T}_x$  flake

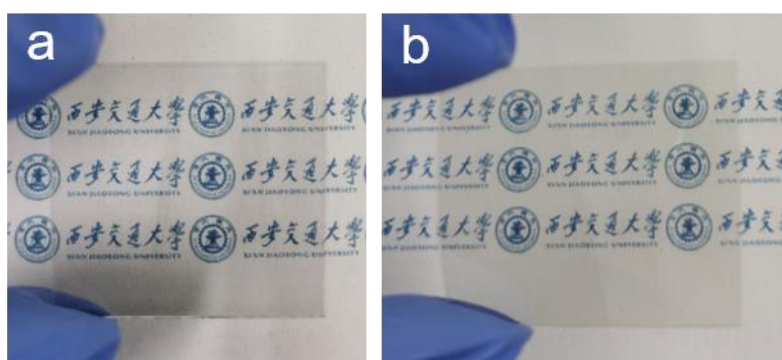

**Figure S4** Digital photograph of  $\text{Ti}_3\text{C}_2\text{T}_x$  films from large-sizes flakes on glass (**a**,  $T=87\%$ ), on PET (**b**,  $T=91\%$ ).

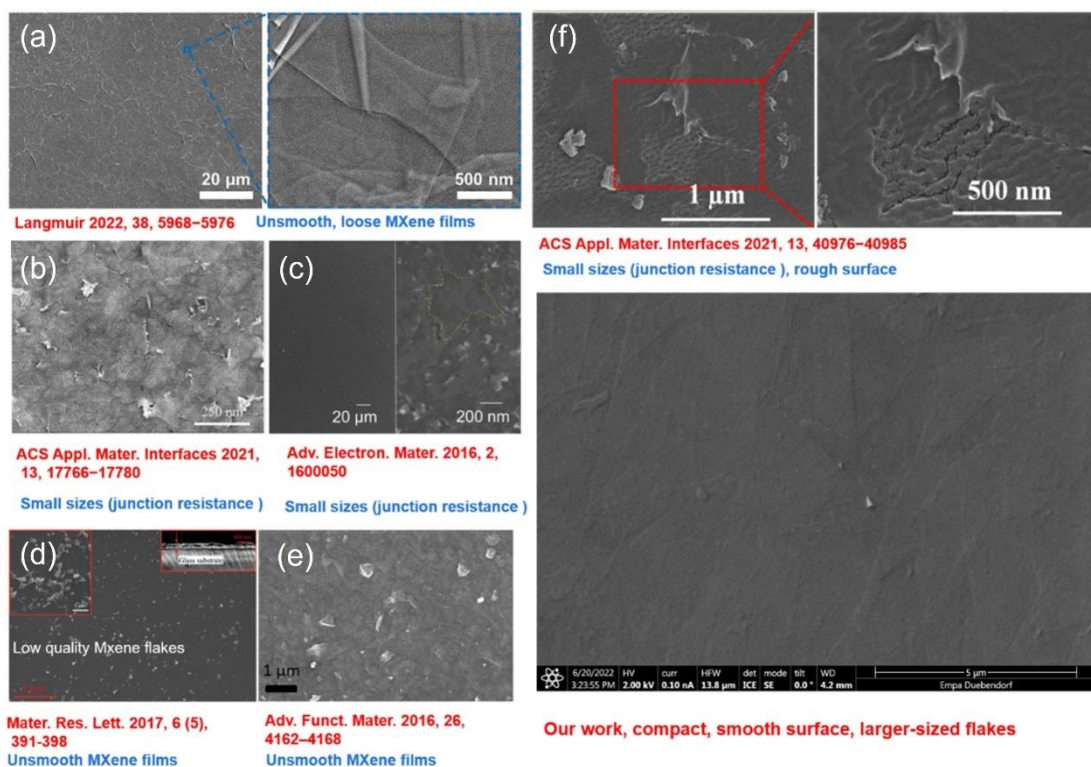

**Figure S5** Comparison of SEM images from previously published works with our transparent MXene film. **a** Reproduced with permission.<sup>1</sup> Copyright 2022, American Chemical Society. **b** Reproduced with permission.<sup>2</sup> Copyright 2021, American Chemical Society. **c** Reproduced with permission.<sup>3</sup> Copyright 2016, John Wiley and Sons. **d** Reproduced with permission.<sup>4</sup> Copyright 2017, Taylor & Francis Group. **e** Reproduced with permission.<sup>5</sup> Copyright 2016, John Wiley and Sons. **f** Reproduced with permission.<sup>6</sup> Copyright 2021, American Chemical Society.

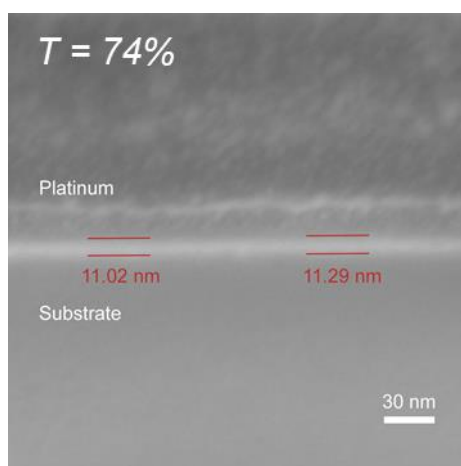

**Figure S6** Cross-sectional FIB-SEM image of a blade coated  $Ti_3C_2T_x$  film. ( $T=74\%$ ).

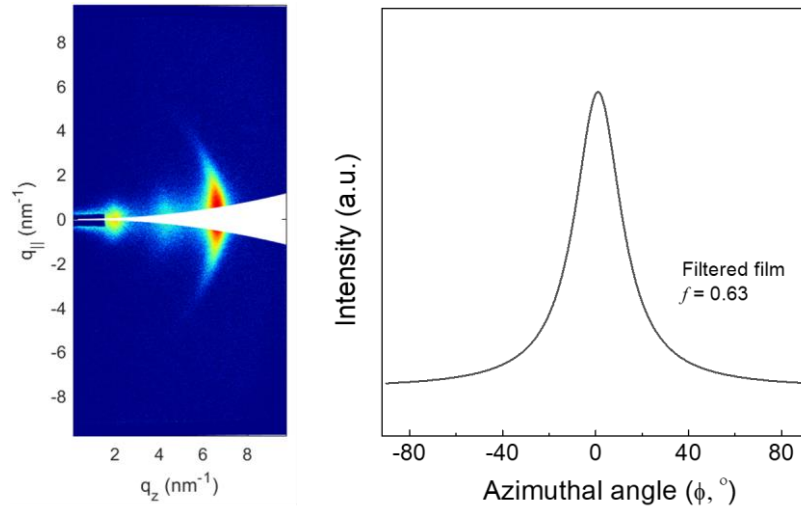

**Figure S7** GISAXS measurement of a filtered film ( $\sim 1 \mu\text{m}$ ). GISAXS detector image showing the (002) peak over  $q_z$ . Lorentzian fit of the azimuthal profile for the (002) peak used to determine Herman's degree of orientation.

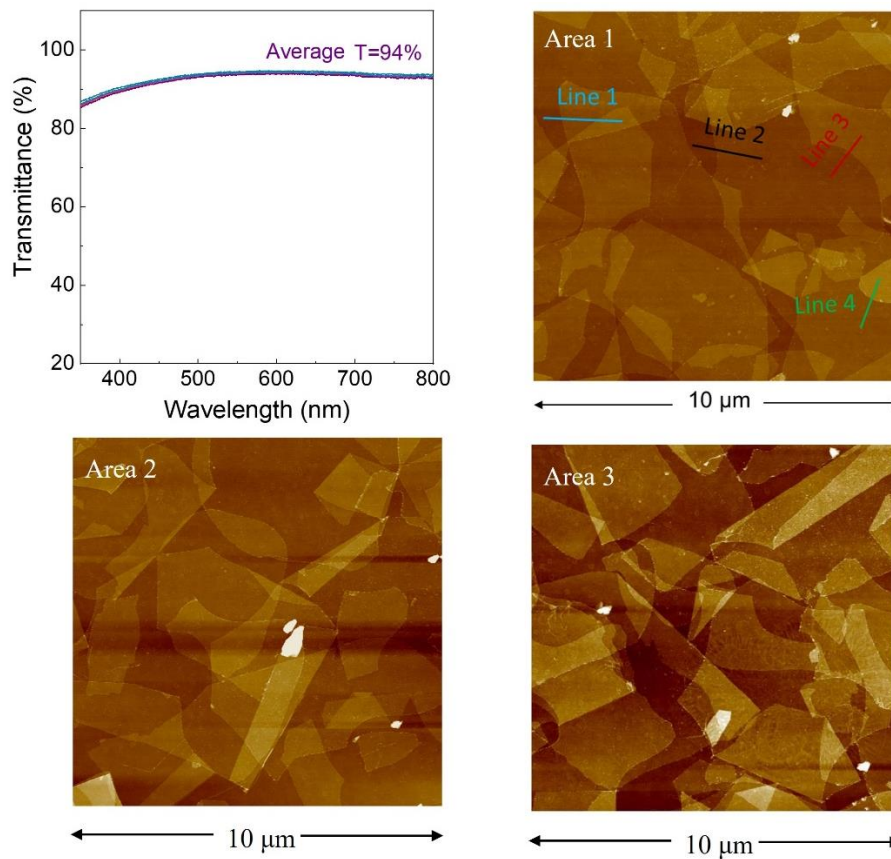

**Figure S8** The average transmittance of TCEs and the surface topography of different regions were measured by AFM.

Methods for calculating the number of layers of high transparency films ( $T=94\%$ ), according to the area percentage of the different layers  $Ti_3C_2T_x$  flakes in the  $10\times 10\ \mu m$  area (for the area 1 image). Areas comprising different numbers of layers in Figure 3f are shown with different colors.

Table S1 Calculation of thickness of high transparency film ( $T=94\%$ ).

|                          | Pixel     | Percentage (%) | Percentage (%) |
|--------------------------|-----------|----------------|----------------|
| Single layer             | 371 691   | 37.5%          | 35.7%          |
| Double layers            | 495 421   | 50.0%          | 47.6%          |
| Triple layers            | 132 210   | 13.4%          | 12.7%          |
| Quadruple layers         | 15 827    | 1.6%           | 1.5%           |
| Substrate (not covered)  | 25 060    | 2.5%           | 2.4%           |
| Actual image pixel       | 990 024   | 105%           |                |
| Statistical pixel totals | 1 040 209 |                | 99.9%          |

Area 1, image pixels:  $996\times 994=990\ 024$

The actual number of pixels counted according to different colors: 1 040 209

Thanks to the pixels at different color boundaries may be counted multiple times, the actual count is slightly higher than the number of pixels in the image.

Method 1:

Single layer:  $371\ 691/990\ 024 = 37.5\%$

Double layers:  $495\ 421/990\ 024 = 50.0\%$

Triple layers:  $132\ 210/990\ 024 = 13.4\%$

Quadruple layers:  $15\ 827/990\ 024 = 1.6\%$

Substrate:  $25\ 060/990\ 024 = 2.5\%$

Layers calculation:  $1\times 0.375+2\times 0.5+3\times 0.134+4\times 0.016=1.84$

Percentage of coverage:  $100\%-2.5\%=97.5\%$

Method 2:

Single layer:  $371\ 691/1\ 040\ 209 = 35.7\%$

Double layers:  $495\ 421/1\ 040\ 209 = 47.6\%$

Triple layers:  $132\ 210/1\ 040\ 209 = 12.7\%$

Quadruple layers:  $15\ 827/1\ 040\ 209 = 1.5\%$

Substrate:  $25\ 060/1\ 040\ 209 = 2.4\%$

Layers calculation:  $1\times 0.357+2\times 0.476+3\times 0.127+4\times 0.015=1.75$

Percentage of coverage:  $100\%-2.4\%=97.6\%$

Thus, the thickness of the TCE ( $T=94\%$ ) is 1.8 layers and the coverage is about 98%.

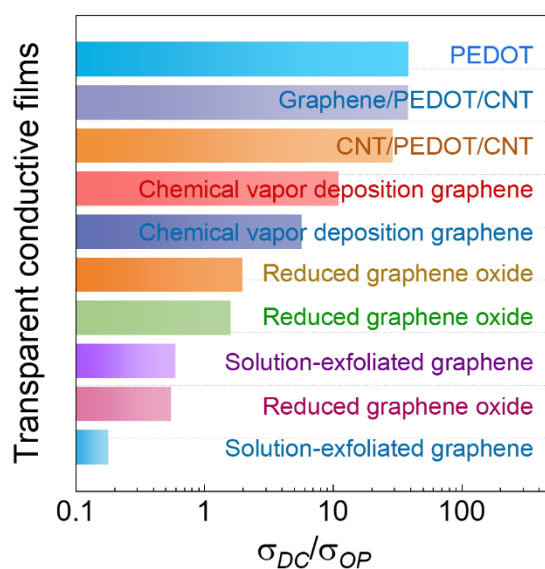

**Figure S9** Comparison of  $\sigma_{DC}/\sigma_{op}$  ( $FOM_e$ ) of various transparent conductive films, detailed values are presented in Table S2.

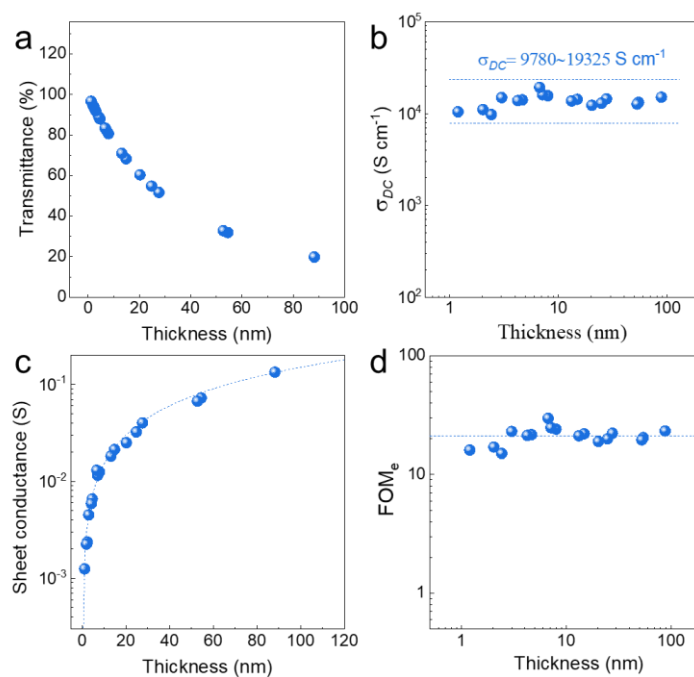

**Figure S10** Relationship between  $Ti_3C_2T_x$  films thickness and optoelectronic properties. **a** Transmittance, **b** DC conductivity, **c** sheet conductance, **d** Ratio of DC conductivity to optical conductivity.

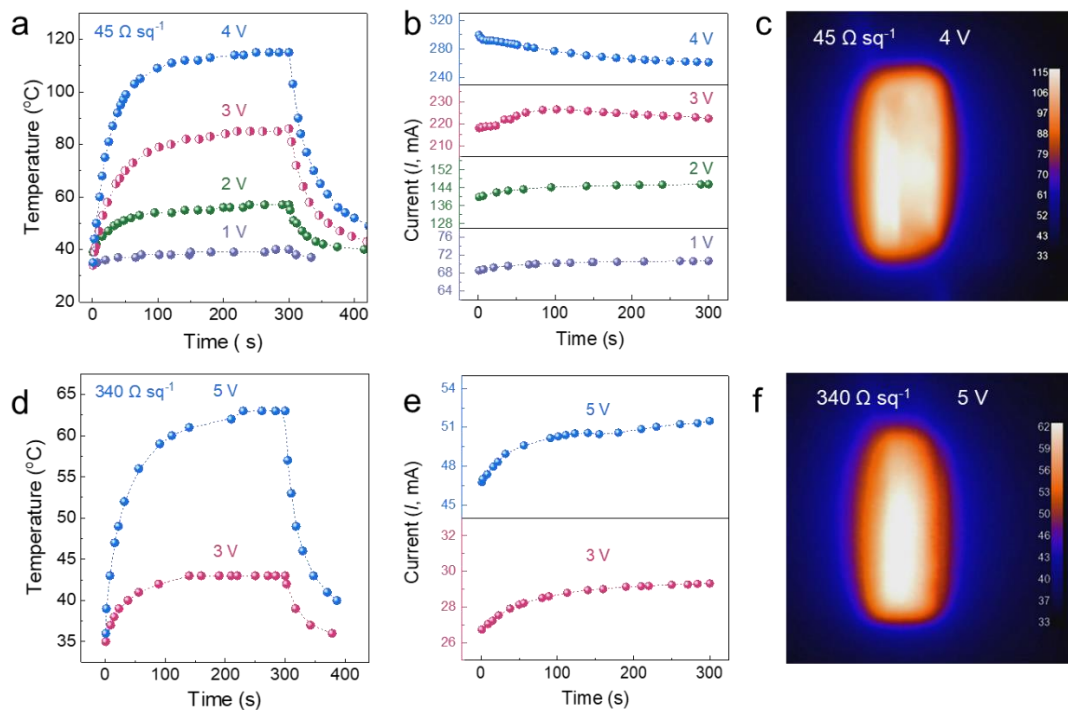

**Figure S11** Electrothermal properties of  $\text{Ti}_3\text{C}_2\text{T}_x$  films. The time-varying surface temperature of the  $\text{Ti}_3\text{C}_2\text{T}_x$  films with  $45 \Omega \text{ sq}^{-1}$  **a)** and  $340 \Omega \text{ sq}^{-1}$  **d)** for different applied voltages. **b), e)** The corresponding current values as a function of time. Infrared radiation (IR) images of the transparent  $\text{Ti}_3\text{C}_2\text{T}_x$  films with  $45 \Omega \text{ sq}^{-1}$  **c)** and  $340 \Omega \text{ sq}^{-1}$  **f)**.

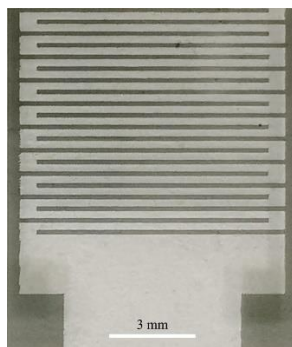

**Figure S12** Digital photograph of  $\text{Ti}_3\text{C}_2\text{T}_x$ -based symmetric micro-supercapacitors



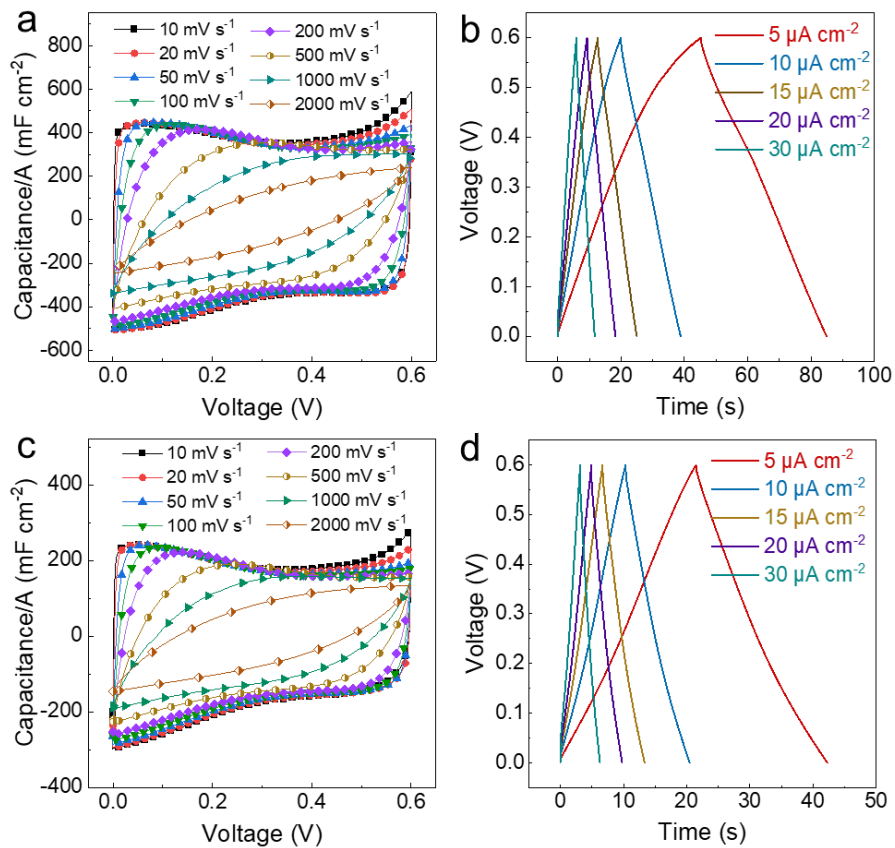

**Figure S13** Electrochemical characterization of  $\text{Ti}_3\text{C}_2\text{T}_x$  films. Normalized CV curves at various scan rates of **a)**  $T=49\%$ , **c)**  $T=61\%$ , and GCD curves at different current densities of **b)**  $T=49\%$ , **d)**  $T=61\%$ .

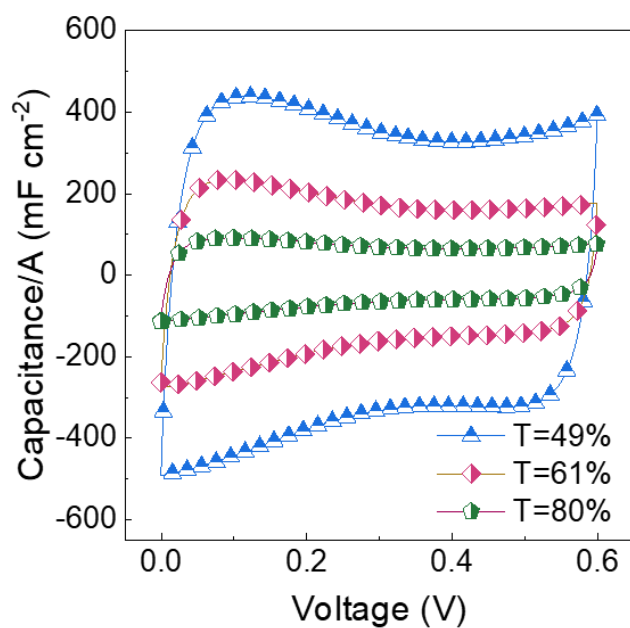

**Figure S14** CV curves with different transparency at  $100 \text{ mV s}^{-1}$ .

**Table S2 of Figure 3b**

| Samples                                       | Sizes                             | Manufacturing technique | Transmittance ( $T_{550\text{ nm}}$ , %) | Sheet resistance ( $\Omega\text{ sq}^{-1}$ ) | FoM <sub>e</sub> | Ref.      |
|-----------------------------------------------|-----------------------------------|-------------------------|------------------------------------------|----------------------------------------------|------------------|-----------|
| Ti <sub>3</sub> C <sub>2</sub> T <sub>x</sub> | 100~300 nm                        | Inkjet-printing         | 24                                       | 1500                                         | 0.12             | 2         |
| Ti <sub>3</sub> C <sub>2</sub> T <sub>x</sub> | ~500 nm                           | Spray-coating           | ~51<br>~81                               | ~625<br>~8160                                | 0.51             | 3         |
| Ti <sub>3</sub> C <sub>2</sub> T <sub>x</sub> | ~80 nm                            | Spin-coating            | 72<br>83<br>90<br>94                     | 2010<br>3850<br>11870<br>23660               | 2                | 7         |
| Ti <sub>3</sub> C <sub>2</sub> T <sub>x</sub> | ~110 nm                           | Spin-coating            | ~72<br>~87                               | ~440<br>~8900                                | 3.1              | 8         |
| Ti <sub>2</sub> CT <sub>x</sub>               | ~1 $\mu\text{m}$                  | Spin-coating            | 65<br>80<br>86<br>96                     | 128<br>507<br>1100<br>6440                   | 5                | 4         |
| V <sub>2</sub> CT <sub>x</sub>                | 0.5~1 $\mu\text{m}$               | Spin-coating            | ~50                                      | ~67                                          | 6.5              | 9         |
| Ti <sub>3</sub> C <sub>2</sub> T <sub>x</sub> | —                                 | Spin-coating            | 86                                       | 330                                          | 7.3              | 5         |
| Ti <sub>3</sub> C <sub>2</sub> T <sub>x</sub> | ~0.5 $\mu\text{m}$                | Dip-coating             | ~86                                      | ~375                                         | 9                | 10        |
| Ti <sub>3</sub> C <sub>2</sub> T <sub>x</sub> | ~1.4 $\mu\text{m}$                | Dip-coating             | ~88                                      | ~600                                         | 14               |           |
| Ti <sub>3</sub> C <sub>2</sub> T <sub>x</sub> | ~1.4 $\mu\text{m}$ /<br>Optimized | Dip-coating             | ~89<br>~92                               | ~320<br>~1870                                | 17               |           |
| Ti <sub>3</sub> C <sub>2</sub> T <sub>x</sub> | 1~2 $\mu\text{m}$                 | Dip-coating             | 51<br>94                                 | 40<br>4300                                   | 14               | 11        |
| Ti <sub>3</sub> C <sub>2</sub> T <sub>x</sub> | ~3.2 $\mu\text{m}$                | Spin-coating            | 86<br>90<br>94                           | 200<br>532<br>1031                           | 15               | 12        |
| Ti <sub>3</sub> C <sub>2</sub> T <sub>x</sub> | 12.2 $\mu\text{m}$                | Blade-coating           | 20                                       | 7.5                                          | 21               | This work |
|                                               |                                   |                         | 60                                       | 40                                           |                  |           |
|                                               |                                   |                         | 81                                       | 80                                           |                  |           |
|                                               |                                   |                         | 89                                       | 170                                          |                  |           |
|                                               |                                   |                         | 94                                       | 423                                          |                  |           |

**Table S3 of Figure S9**

| Samples                     | FoM <sub>e</sub> | Ref. |
|-----------------------------|------------------|------|
| PEDOT                       | 39               | 13   |
| Graphene/PEDOT/CNT          | 38.6             | 14   |
| CNT/PEDOT/CNT               | 29.18            | 15   |
| CVD-graphene                | 11.13            | 16   |
| CVD-graphene                | 5.7              | 17   |
| Reduced graphene oxide      | 2                | 18   |
| Reduced graphene oxide      | 1.6              | 19   |
| Solution-exfoliate graphene | 0.6              | 20   |

|                              |      |    |
|------------------------------|------|----|
| Reduced graphene oxide       | 0.55 | 21 |
| Solution-exfoliated graphene | 0.18 | 22 |

**Table S4 of Figure 4c**

| Samples                                         | Average electronic conductivity (S cm <sup>-1</sup> ) | Ref.             |
|-------------------------------------------------|-------------------------------------------------------|------------------|
| Reduced graphene oxide                          | 550                                                   | 23               |
| Reduced graphene oxide                          | 1425                                                  | 24               |
| Ti <sub>3</sub> C <sub>2</sub> T <sub>x</sub>   | 3092                                                  | 8                |
| Ti <sub>2</sub> CT <sub>x</sub>                 | 5250                                                  | 4                |
| Ti <sub>3</sub> C <sub>2</sub> T <sub>x</sub>   | 6500                                                  | 5                |
| Ti <sub>3</sub> C <sub>2</sub> T <sub>x</sub>   | 7450                                                  | 12               |
| Ti <sub>3</sub> C <sub>2</sub> T <sub>x</sub>   | 7530                                                  | 10               |
| <b>Ti<sub>3</sub>C<sub>2</sub>T<sub>x</sub></b> | <b>15000</b>                                          | <b>This work</b> |

**Table S5 of Figure 6g**

| Samples                                         | Transmittance (T <sub>550 nm</sub> ,%) | Capacitance (μF cm <sup>-2</sup> ) | Ref.             |
|-------------------------------------------------|----------------------------------------|------------------------------------|------------------|
| Graphene Q-dot                                  | 93                                     | 9.1                                | 25               |
| Graphene networks                               | 84                                     | 4.2                                | 26               |
| Wrinkled graphene                               | 60                                     | 5.8                                | 27               |
| Graphene film                                   | 67                                     | 12.4                               | 28               |
| Ti <sub>3</sub> C <sub>2</sub> T <sub>x</sub>   | 88                                     | 19                                 | 11               |
|                                                 | 38                                     | 283                                |                  |
| Ti <sub>3</sub> C <sub>2</sub> T <sub>x</sub>   | 81                                     | 870                                | 12               |
| Ti <sub>3</sub> C <sub>2</sub> T <sub>x</sub>   | 73                                     | 192                                | 2                |
| <b>Ti<sub>3</sub>C<sub>2</sub>T<sub>x</sub></b> | <b>49</b>                              | <b>383.16</b>                      | <b>This work</b> |
|                                                 | <b>61</b>                              | <b>189.5</b>                       |                  |
|                                                 | <b>80</b>                              | <b>75.3</b>                        |                  |

**Table S6 of Figure 6h**

| Samples                                       | Transmittance<br>(T <sub>550 nm</sub> , %) | Power density<br>( $\mu\text{W cm}^{-2}$ ) | Energy density( $\mu\text{Wh cm}^{-2}$ ) | Ref.         |
|-----------------------------------------------|--------------------------------------------|--------------------------------------------|------------------------------------------|--------------|
| Graphene film                                 | 67                                         | 70                                         | 0.00047                                  | 28           |
| Ti <sub>3</sub> C <sub>2</sub> T <sub>x</sub> | 88                                         | 0.0188                                     | 0.00163                                  | 11           |
|                                               | 38                                         | 1.3                                        | 0.01                                     |              |
| Ti <sub>3</sub> C <sub>2</sub> T <sub>x</sub> | 73                                         | 0.077                                      | 0.0043                                   | 2            |
| Ti <sub>3</sub> C <sub>2</sub> T <sub>x</sub> | 49                                         | 1.1496                                     | 0.01916                                  | This<br>work |
|                                               |                                            | 2.28                                       | 0.019                                    |              |
|                                               |                                            | 5.526                                      | 0.01842                                  |              |
|                                               |                                            | 10.608                                     | 0.01768                                  |              |
|                                               |                                            | 19.836                                     | 0.01653                                  |              |
|                                               | 61                                         | 0.5682                                     | 0.00947                                  |              |
|                                               |                                            | 1.1244                                     | 0.00937                                  |              |
|                                               |                                            | 2.733                                      | 0.00911                                  |              |
|                                               |                                            | 5.244                                      | 0.00874                                  |              |
|                                               |                                            | 9.792                                      | 0.00816                                  |              |
|                                               | 80                                         | 0.2256                                     | 0.00376                                  |              |
|                                               |                                            | 0.4512                                     | 0.00376                                  |              |
|                                               |                                            | 1.098                                      | 0.00366                                  |              |
|                                               |                                            | 2.118                                      | 0.00353                                  |              |
|                                               |                                            | 3.948                                      | 0.00329                                  |              |

**References**

- (1) Huang, L.; Lin, Y.; Zeng, W.; Xu, C.; Chen, Z.; Wang, Q.; Zhou, H.; Yu, Q.; Zhao, B.; Ruan, L.; et al. Highly Transparent and Flexible Zn-Ti<sub>3</sub>C<sub>2</sub>T<sub>x</sub> MXene Hybrid Capacitors. *Langmuir* **2022**, *38*, 5968-5976.
- (2) Wen, D.; Wang, X.; Liu, L.; Hu, C.; Sun, C.; Wu, Y.; Zhao, Y.; Zhang, J.; Liu, X.; Ying, G. Inkjet Printing Transparent and Conductive MXene (Ti<sub>3</sub>C<sub>2</sub>T<sub>x</sub>) Films: A Strategy for Flexible Energy Storage Devices. *ACS Appl. Mater. Inter.* **2021**, *13*, 17766-17780.
- (3) Hantanasirisakul, K.; Zhao, M. Q.; Urbankowski, P.; Halim, J.; Anasori, B.; Kota, S.; Ren, C. E.; Barsoum, M. W.; Gogotsi, Y. Fabrication of Ti<sub>3</sub>C<sub>2</sub>T<sub>x</sub> MXene Transparent

Thin Films with Tunable Optoelectronic Properties. *Adv. Electron. Mater.* **2016**, *2*, 1600050.

(4) Ying, G.; Dillon, A. D.; Fafarman, A. T.; Barsoum, M. W. Transparent, conductive solution processed spincoated 2D Ti<sub>2</sub>CT<sub>x</sub> (MXene) films. *Mater. Res. Lett.* **2017**, *5*, 391-398.

(5) Dillon, A. D.; Ghidui, M. J.; Krick, A. L.; Griggs, J.; May, S. J.; Gogotsi, Y.; Barsoum, M. W.; Fafarman, A. T. Highly Conductive Optical Quality Solution-Processed Films of 2D Titanium Carbide. *Adv. Funct. Mater.* **2016**, *26*, 4162-4168.

(6) Kumar, S.; Kang, D.; Nguyen, V. H.; Nasir, N.; Hong, H.; Kim, M.; Nguyen, D. C.; Lee, Y. J.; Lee, N.; Seo, Y. Application of Titanium-Carbide MXene-Based Transparent Conducting Electrodes in Flexible Smart Windows. *ACS Appl. Mater. Inter.* **2021**, *13*, 40976-40985.

(7) Ebrahimi, M.; Mei, C. T. Optoelectronic properties of Ti<sub>3</sub>C<sub>2</sub>T<sub>x</sub> MXene transparent conductive electrodes: Microwave synthesis of parent MAX phase. *Ceram. Int.* **2020**, *46*, 28114-28119.

(8) Mariano, M.; Mashtalir, O.; Antonio, F. Q.; Ryu, W. H.; Deng, B.; Xia, F.; Gogotsi, Y.; Taylor, A. D. Solution-processed titanium carbide MXene films examined as highly transparent conductors. *Nanoscale* **2016**, *8*, 16371-16378.

(9) Ying, G.; Kota, S.; Dillon, A. D.; Fafarman, A. T.; Barsoum, M. W. Conductive transparent V<sub>2</sub>CT<sub>x</sub> (MXene) films. *FlatChem* **2018**, *8*, 25-30.

(10) Salles, P.; Pinto, D.; Hantanasirisakul, K.; Maleski, K.; Shuck, C. E.; Gogotsi, Y. Electrochromic Effect in Titanium Carbide MXene Thin Films Produced by Dip-Coating. *Adv. Funct. Mater.* **2019**, *29*, 1809223.

(11) Salles, P.; Quain, E.; Kurra, N.; Sarycheva, A.; Gogotsi, Y. Automated Scalpel Patterning of Solution Processed Thin Films for Fabrication of Transparent MXene Microsupercapacitors. *Small* **2018**, *14*, e1802864.

(12) Zhang, C. J.; Anasori, B.; Seral-Ascaso, A.; Park, S. H.; McEvoy, N.; Shmeliov, A.; Duesberg, G. S.; Coleman, J. N.; Gogotsi, Y.; Nicolosi, V. Transparent, Flexible, and Conductive 2D Titanium Carbide (MXene) Films with High Volumetric Capacitance. *Adv. Mater.* **2017**, *29*, 1702678.

(13) Higgins, T. M.; Coleman, J. N. Avoiding Resistance Limitations in High-Performance Transparent Supercapacitor Electrodes Based on Large-Area, High-Conductivity PEDOT:PSS Films. *ACS Appl. Mater. Inter.* **2015**, *7*, 16495-16506.

(14) Wang, T.; Wang, Y. Z.; Jing, L. C.; Zhu, Q.; Ethiraj, A. S.; Geng, W.; Tian, Y.; Zhu, Z.; Meng, Z.; Geng, H. Z. Novel biodegradable and ultra-flexible transparent conductive film for green light OLED devices. *Carbon* **2021**, *172*, 379-389.

(15) Gu, Z. Z.; Tian, Y.; Geng, H. Z.; Rhen, D. S.; Ethiraj, A. S.; Zhang, X.; Jing, L. C.; Wang, T.; Xu, Z. H.; Yuan, X. T. Highly conductive sandwich-structured CNT/PEDOT:PSS/CNT transparent conductive films for OLED electrodes. *Appl. Nanosci.* **2019**, *9*, 1971-1979.

- (16) Cai, W.; Zhu, Y.; Li, X.; Piner, R. D.; Ruoff, R. S. Large area few-layer graphene/graphite films as transparent thin conducting electrodes. *Appl. Phys. Lett.* **2009**, *95*, 123115.
- (17) Kim, K. S.; Zhao, Y.; Jang, H.; Lee, S. Y.; Kim, J. M.; Kim, K. S.; Ahn, J. H.; Kim, P.; Choi, J. Y.; Hong, B. H. Large-scale pattern growth of graphene films for stretchable transparent electrodes. *Nature* **2009**, *457*, 706-710.
- (18) Zhao, J. P.; Pei, S. F.; Ren, W. C.; Gao, L. B.; Cheng, H. M. Efficient Preparation of Large-Area Graphene Oxide Sheets for Transparent Conductive Films. *ACS Nano* **2010**, *4*, 5245-5252.
- (19) Becerril, H. A.; Mao, J.; Liu, Z.; Stoltenberg, R. M.; Bao, Z.; Chen, Y. Evaluation of solution-processed reduced graphene oxide films as transparent conductors. *ACS Nano* **2008**, *2*, 463-470.
- (20) Green, A. A.; Hersam, M. C. Solution Phase Production of Graphene with Controlled Thickness via Density Differentiation. *Nano Lett.* **2009**, *9*, 4031-4036.
- (21) Liang, Y.; Frisch, J.; Zhi, L.; Norouzi-Arasi, H.; Feng, X.; Rabe, J. P.; Koch, N.; Mullen, K. Transparent, highly conductive graphene electrodes from acetylene-assisted thermolysis of graphite oxide sheets and nanographene molecules. *Nanotechnology* **2009**, *20*, 434007.
- (22) Li, X. L.; Zhang, G. Y.; Bai, X. D.; Sun, X. M.; Wang, X. R.; Wang, E.; Dai, H. J. Highly conducting graphene sheets and Langmuir-Blodgett films. *Nat. Nanotechnol.* **2008**, *3*, 538-542.
- (23) Wang, X.; Zhi, L. J.; Mullen, K. Transparent, conductive graphene electrodes for dye-sensitized solar cells. *Nano Lett.* **2008**, *8*, 323-327.
- (24) Liang, Y. Y.; Frisch, J.; Zhi, L. J.; Norouzi-Arasi, H.; Feng, X. L.; Rabe, J. P.; Koch, N.; Mullen, K. Transparent, highly conductive graphene electrodes from acetylene-assisted thermolysis of graphite oxide sheets and nanographene molecules. *Nanotechnology* **2009**, *20*.
- (25) Lee, K.; Lee, H.; Shin, Y.; Yoon, Y.; Kim, D.; Lee, H. Highly transparent and flexible supercapacitors using graphene-graphene quantum dots chelate. *Nano Energy* **2016**, *26*, 746-754.
- (26) Fan, X.; Chen, T.; Dai, L. Graphene networks for high-performance flexible and transparent supercapacitors. *RSC Adv.* **2014**, *4*, 36996.
- (27) Chen, T.; Xue, Y. H.; Roy, A. K.; Dai, L. M. Transparent and Stretchable High-Performance Supercapacitors Based on Wrinkled Graphene Electrodes. *ACS Nano* **2014**, *8*, 1039-1046.
- (28) Gao, Y.; Zhou, Y. S.; Xiong, W.; Jiang, L. J.; Mahjouri-samani, M.; Thirugnanam, P.; Huang, X.; Wang, M. M.; Jiang, L.; Lu, Y. F. Transparent, flexible, and solid-state supercapacitors based on graphene electrodes. *APL Mater.* **2013**, *1*, 012101.
